# Supplementary material for: Efficient and stable perovskite solar cells based on functional graphene-modified P3HT hole-transporting layer
Source: Royal Society of Chemistry journal article supplement (doi:10.1039/c6ra03466g), 2016-01-01
Supplement: c6ra03466g1.pdf [file c6ra03466g1.pdf]

## Supporting information

### Efficient and Stable Perovskite Solar Cells Based on Functional Graphene-Modified P3HT Hole-Transporting Layer

<sup>1</sup>Department of Chemistry and Environmental Engineering, Bengbu College, Bengbu, Anhui 233030, China.

<sup>2</sup>Department of Application Chemistry, School of Chemical Engineering, Hefei University of Technology, Hefei, Anhui 230009, China.

\*Corresponding author. E-mail: bbyejian@126.com (J. Ye).

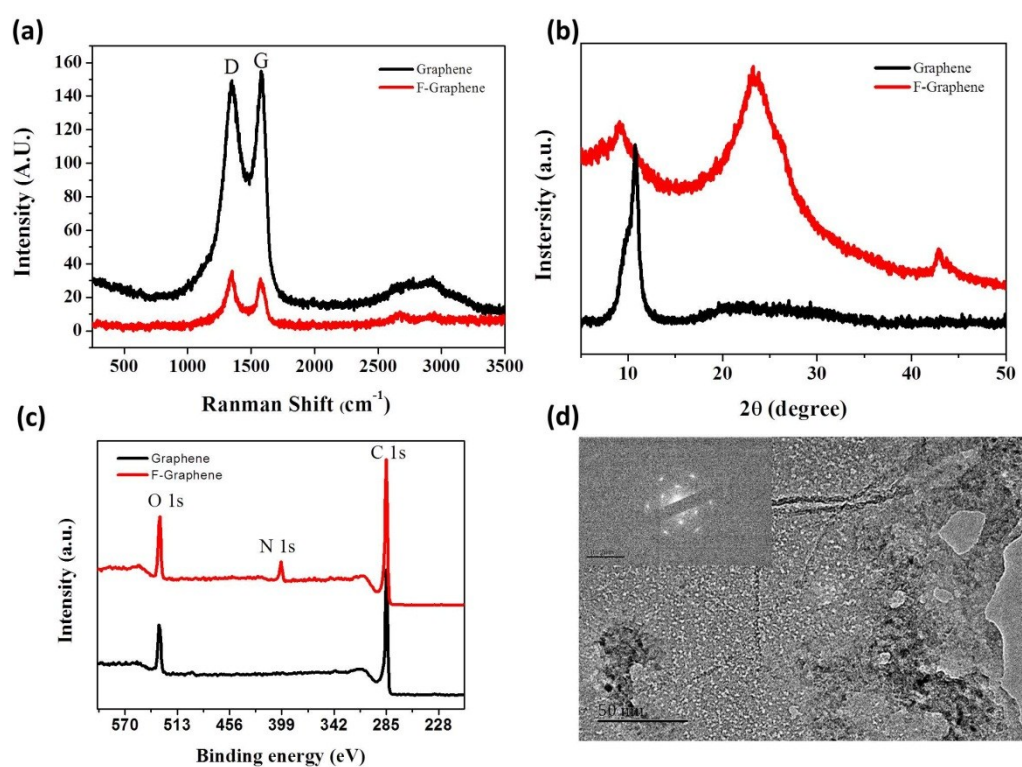

**Figure S1.** (a) Raman spectrum, (b) X-ray diffraction and (c) X-ray photoelectron spectroscopy (XPS) of pristine graphene powders (black line) and functional graphene powders (red line). (d) the Transmission Electron Microscope image of functional graphene.

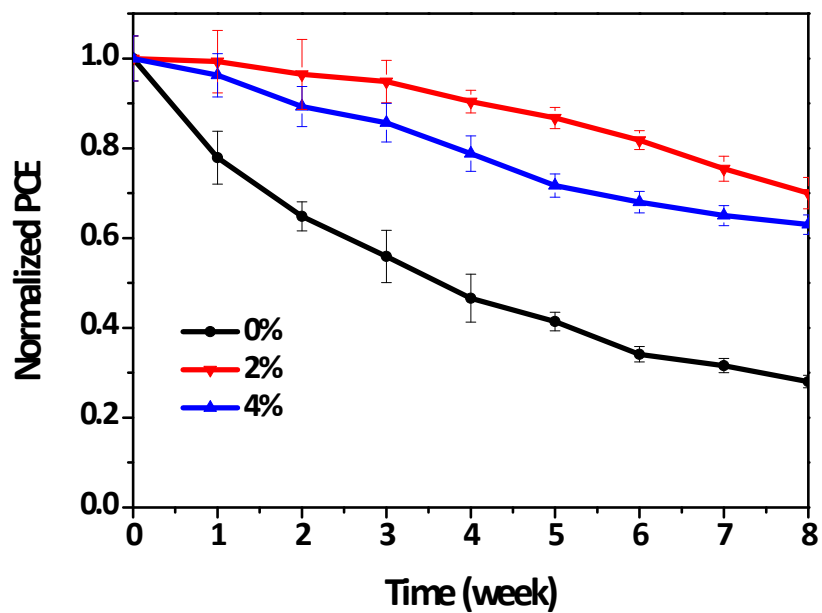

**Figure S2** The normalized PCE of various weight content of F-graphene in P3HT HTMs based PSCs as a function of storage time in the ambient atmosphere (temperature 25°C, humidity 20%–40%).

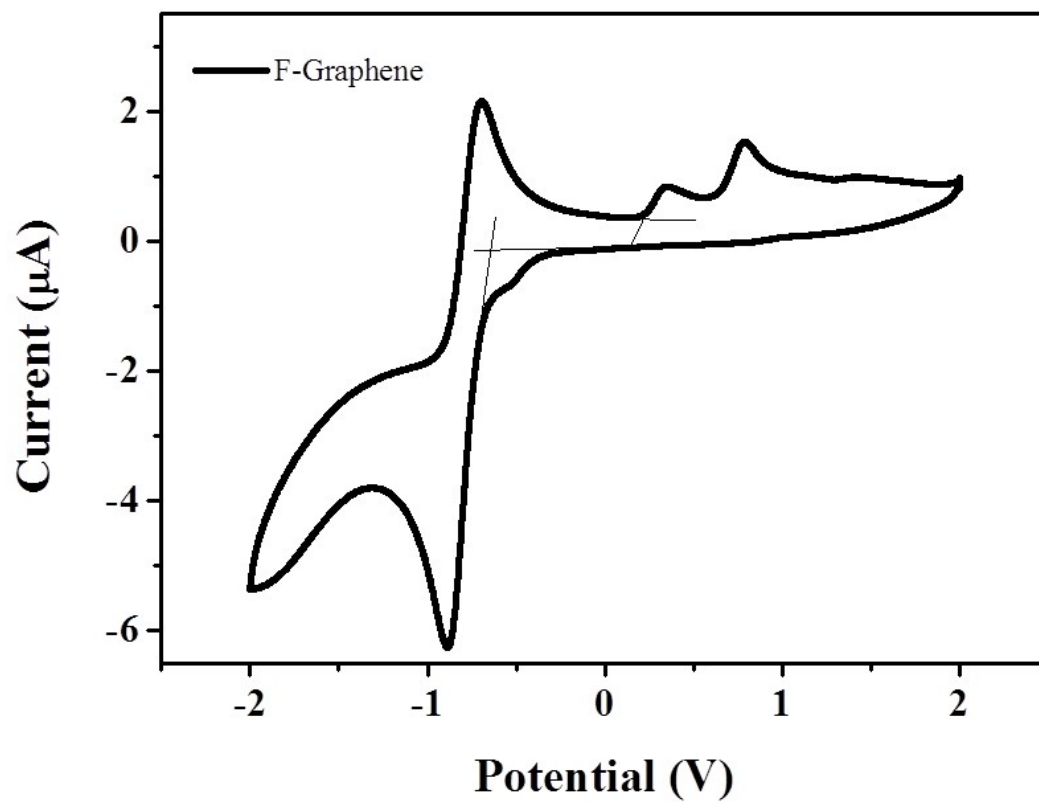

**Figure S3.** Cyclic voltammetry of the F-graphene drop-cast on a Pt electrode in a 0.1 mol L<sup>-1</sup> Bu<sub>4</sub>NPF<sub>6</sub>-acetonitrile solution at a scan rate of 50 mV s<sup>-1</sup>
